# Supplementary material
Source: PubMed Central journal article supplement (PMC5142071)

**Title:** *Acute Kidney Injury in the era of the AKI e-alert*

**Supplemental Material**

**Supplemental Table 1.** Staging of AKI

**Supplemental Table 2.** E-alert rules.

**Supplemental Table 3.** AKI e-alert codes and their corresponding triggers, AKI rules, AKI stages

**Supplemental Table 4.** Specialties labelled 'Other' in Figure 1C

**Supplemental Table 5.** Specialties labelled 'Other' in Fig 1D

**Supplemental Figure 1:** Geographical location of Welsh Local Health boards and their associated descriptive demographic data.

**Supplemental Figure 2:** Algorithm for generating e-alerts for Acute Kidney Injury based on serum creatinine (SCr) changes with time.

**Supplemental Table 1.** Staging of AKI

| Stage | Serum creatinine                                             |
|-------|--------------------------------------------------------------|
| 1     | 1.5 -1.9 times baseline or $\geq 26\mu\text{mol/L}$ increase |
| 2     | 2.0-2.9 times baseline                                       |
| 3     | 3.0 times baseline or $\geq 354\mu\text{mol/L}$              |

**Supplemental Table 2.** E-alert rules.

| Rule | Description                                                               | Associated alert                                                           |
|------|---------------------------------------------------------------------------|----------------------------------------------------------------------------|
| 1    | >26 $\mu$ mol/L increase in creatinine in previous 48 hours               | <i>Acute Kidney Injury alert: rising creatinine within last 48 hours</i>   |
| 2    | >50% increase in creatinine in previous 7 days                            | <i>Acute Kidney Injury alert: rising creatinine within last 7 days</i>     |
| 3    | >50% increase in creatinine against median result for previous 8-365 days | <i>Acute Kidney Injury alert – creatinine increase over baseline value</i> |

**Supplemental Table 3.** AKI e-alert codes and their corresponding triggers, AKI rules, AKI stages

| E-alert code | Trigger                                                    | AKI rule | AKI stage |
|--------------|------------------------------------------------------------|----------|-----------|
| DELTA1       | D>26 $\mu$ mol/L and no other rule triggered               | 1        | 1         |
| ABS1         | C1/RV1>C1/RV2 and C1/RV1 $\geq$ 1.5 and C1>354 $\mu$ mol/L | 2        | 3         |
| ABS2         | C1/RV2>C1/RV1 and C1/RV2 $\geq$ 1.5 and C1>354 $\mu$ mol/L | 3        | 3         |
| R1AKI1       | C1/RV1>C1/RV2 and C1/RV1 $\geq$ 1.5 and C1/RV1<2.0         | 2        | 1         |
| R1AKI2       | C1/RV1>C1/RV2 and C1/RV1 $\geq$ 2.0 and C1/RV1<3.0         | 2        | 2         |
| R1AKI3       | C1/RV1>C1/RV2 and C1/RV1 $\geq$ 3.0                        | 2        | 3         |
| R2AKI1       | C1/RV2>C1/RV1 and C1/RV2 $\geq$ 1.5 and C1/RV2<2.0         | 3        | 1         |
| R2AKI2       | C1/RV2>C1/RV1 and C1/RV2 $\geq$ 2.0 and C1/RV2<3.0         | 3        | 2         |
| R2AKI3       | C1/RV2>C1/RV1 and C1/RV2 $\geq$ 3.0                        | 3        | 3         |

D, Difference between C1 and lowest previous serum creatinine (SCr) value within 48 hours; C1, Index SCr value (current result entered and authorised on the LIMS); RV1, Reference value 1, lowest SCr value existing within previous 7 days; RV2, Reference value 2, median of SCr values existing within previous 8-365 days.

**Supplemental Table 4.** Specialties labelled 'Other' in Figure 1C

| Specialty                              | N AKI episodes | %     |
|----------------------------------------|----------------|-------|
| Thoracic Medicine                      | 85             | 1.45% |
| Medical Oncology                       | 82             | 1.40% |
| Rheumatology                           | 65             | 1.11% |
| Nephrology                             | 54             | 0.92% |
| Endocrinology                          | 45             | 0.77% |
| GP Other                               | 30             | 0.51% |
| Cardiothoracic Surgery                 | 29             | 0.50% |
| Rehabilitation                         | 27             | 0.46% |
| Gynaecology                            | 25             | 0.43% |
| Chemical Pathology                     | 25             | 0.43% |
| Clinical Pharmacology and therapeutics | 24             | 0.41% |
| Anaesthetics                           | 17             | 0.29% |
| Palliative Medicine                    | 15             | 0.26% |
| Pain Management                        | 14             | 0.24% |
| Old Age Psychiatry                     | 14             | 0.24% |
| Obstetrics (for patients using a bed)  | 13             | 0.22% |
| Dermatology                            | 13             | 0.22% |
| Mental Illness                         | 12             | 0.21% |
| ENT                                    | 10             | 0.17% |
| Paediatrics                            | 9              | 0.15% |
| Ophthalmology                          | 6              | 0.10% |
| Neurology                              | 6              | 0.10% |
| Plastic Surgery                        | 6              | 0.10% |
| Oral Surgery                           | 5              | 0.09% |
| Not Known                              | 5              | 0.09% |
| Obstetrics PN (outpatients)            | 4              | 0.07% |
| Haematology (non-clinical)             | 4              | 0.07% |
| Arts therapist                         | 4              | 0.07% |
| Radiology                              | 4              | 0.07% |
| Obstetrics AN (outpatients)            | 3              | 0.05% |
| Mental Handicap                        | 2              | 0.03% |
| Community Medicine                     | 2              | 0.03% |
| Genito Urinary Medicine                | 2              | 0.03% |
| Clinical Immunology and Allergy        | 2              | 0.03% |
| Midwifery                              | 1              | 0.02% |
| General Pathology                      | 1              | 0.02% |
| Restorative Dentistry                  | 1              | 0.02% |

**Supplemental Table 5.** Specialties labelled 'Other' in Fig 1D

| Specialty                              | N of AKI episodes | %     |
|----------------------------------------|-------------------|-------|
| Haematology (Clinical)                 | 135               | 2.05% |
| Endocrinology                          | 117               | 1.77% |
| Rehabilitation                         | 95                | 1.44% |
| Obstetrics (for patients using a bed)  | 81                | 1.23% |
| Gynaecology                            | 79                | 1.20% |
| Accident & Emergency                   | 62                | 0.94% |
| Old Age Psychiatry                     | 59                | 0.89% |
| Nephrology                             | 59                | 0.89% |
| GP Other                               | 50                | 0.76% |
| Clinical Oncology                      | 47                | 0.71% |
| Neurosurgery                           | 27                | 0.41% |
| Mental Illness                         | 23                | 0.35% |
| Clinical Pharmacology and therapeutics | 17                | 0.26% |
| ENT                                    | 16                | 0.24% |
| Paediatrics                            | 15                | 0.23% |
| Medical Oncology                       | 12                | 0.18% |
| Neurology                              | 9                 | 0.14% |
| Oral Surgery                           | 7                 | 0.11% |
| Plastic Surgery                        | 7                 | 0.11% |
| Community Medicine                     | 6                 | 0.09% |
| Rheumatology                           | 4                 | 0.06% |
| Dermatology                            | 4                 | 0.06% |
| Chemical Pathology                     | 3                 | 0.05% |
| Clinical Genetics                      | 3                 | 0.05% |
| Ophthalmology                          | 2                 | 0.03% |
| General Pathology                      | 2                 | 0.03% |
| Midwifery                              | 2                 | 0.03% |
| Restorative Dentistry                  | 1                 | 0.02% |
| Genito Urinary Medicine                | 1                 | 0.02% |
| Psychotherapy                          | 1                 | 0.02% |
| Radiology                              | 1                 | 0.02% |
| Palliative Medicine                    | 1                 | 0.02% |
| Obstetrics AN (outpatients)            | 1                 | 0.02% |
| Pain Management                        | 1                 | 0.02% |
| Mental Handicap                        | 1                 | 0.02% |

**Supplemental Figure Legends:**

**Supplemental Figure 1:** Geographical location of Welsh Local Health boards and their associated descriptive demographic data. UHB, University Health Board; tHB, Teaching Health Board; DGH, District General Hospital; GP, General Practitioner.

**Supplemental Figure 2:** Algorithm for generating e-alerts for Acute Kidney Injury based on serum creatinine (SCr) changes with time. RV, Reference value, defined as the SCr value with which the index SCr value is compared; D, difference between current and lowest previous result within 48 hours; RI, Population reference interval.

**SUPPLEMENTARY FIGURE 1**

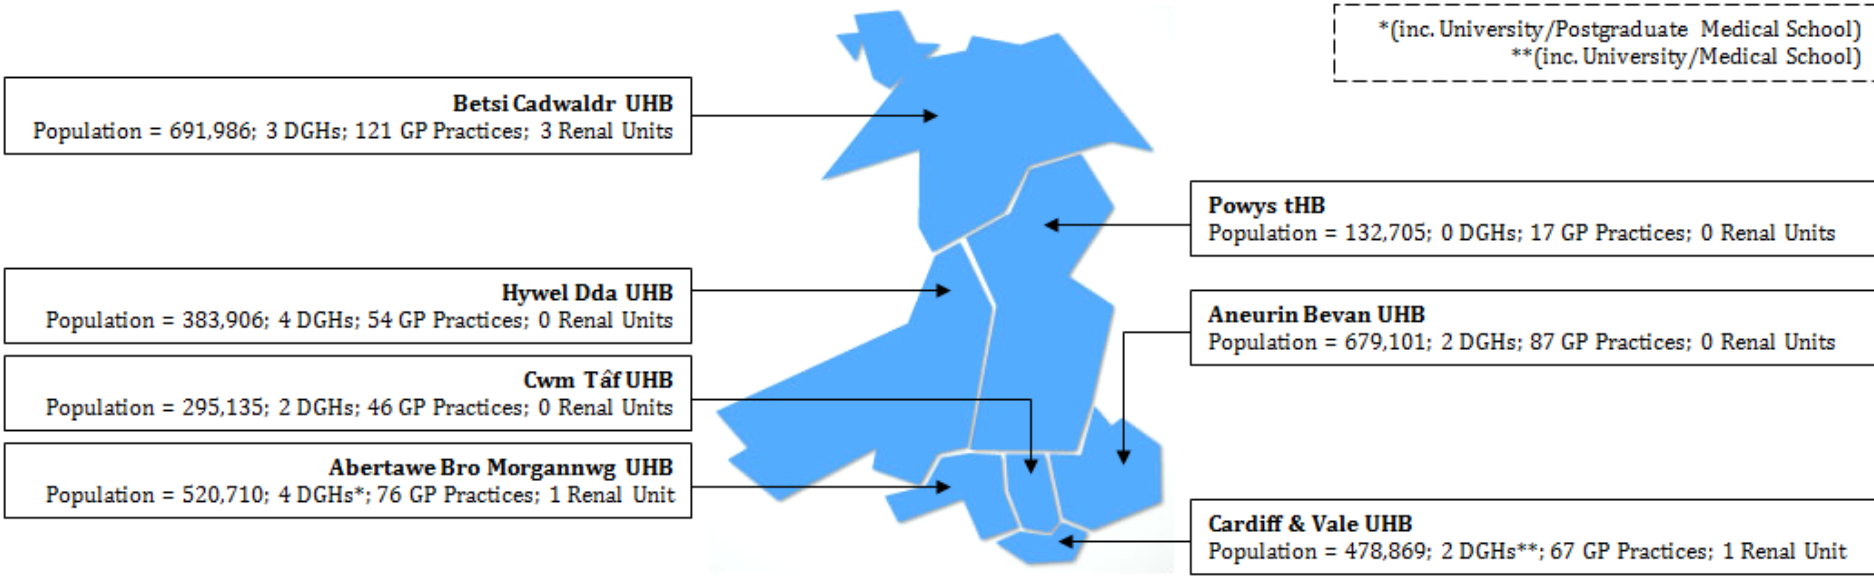



**SUPPLEMENTARY FIGURE 2**

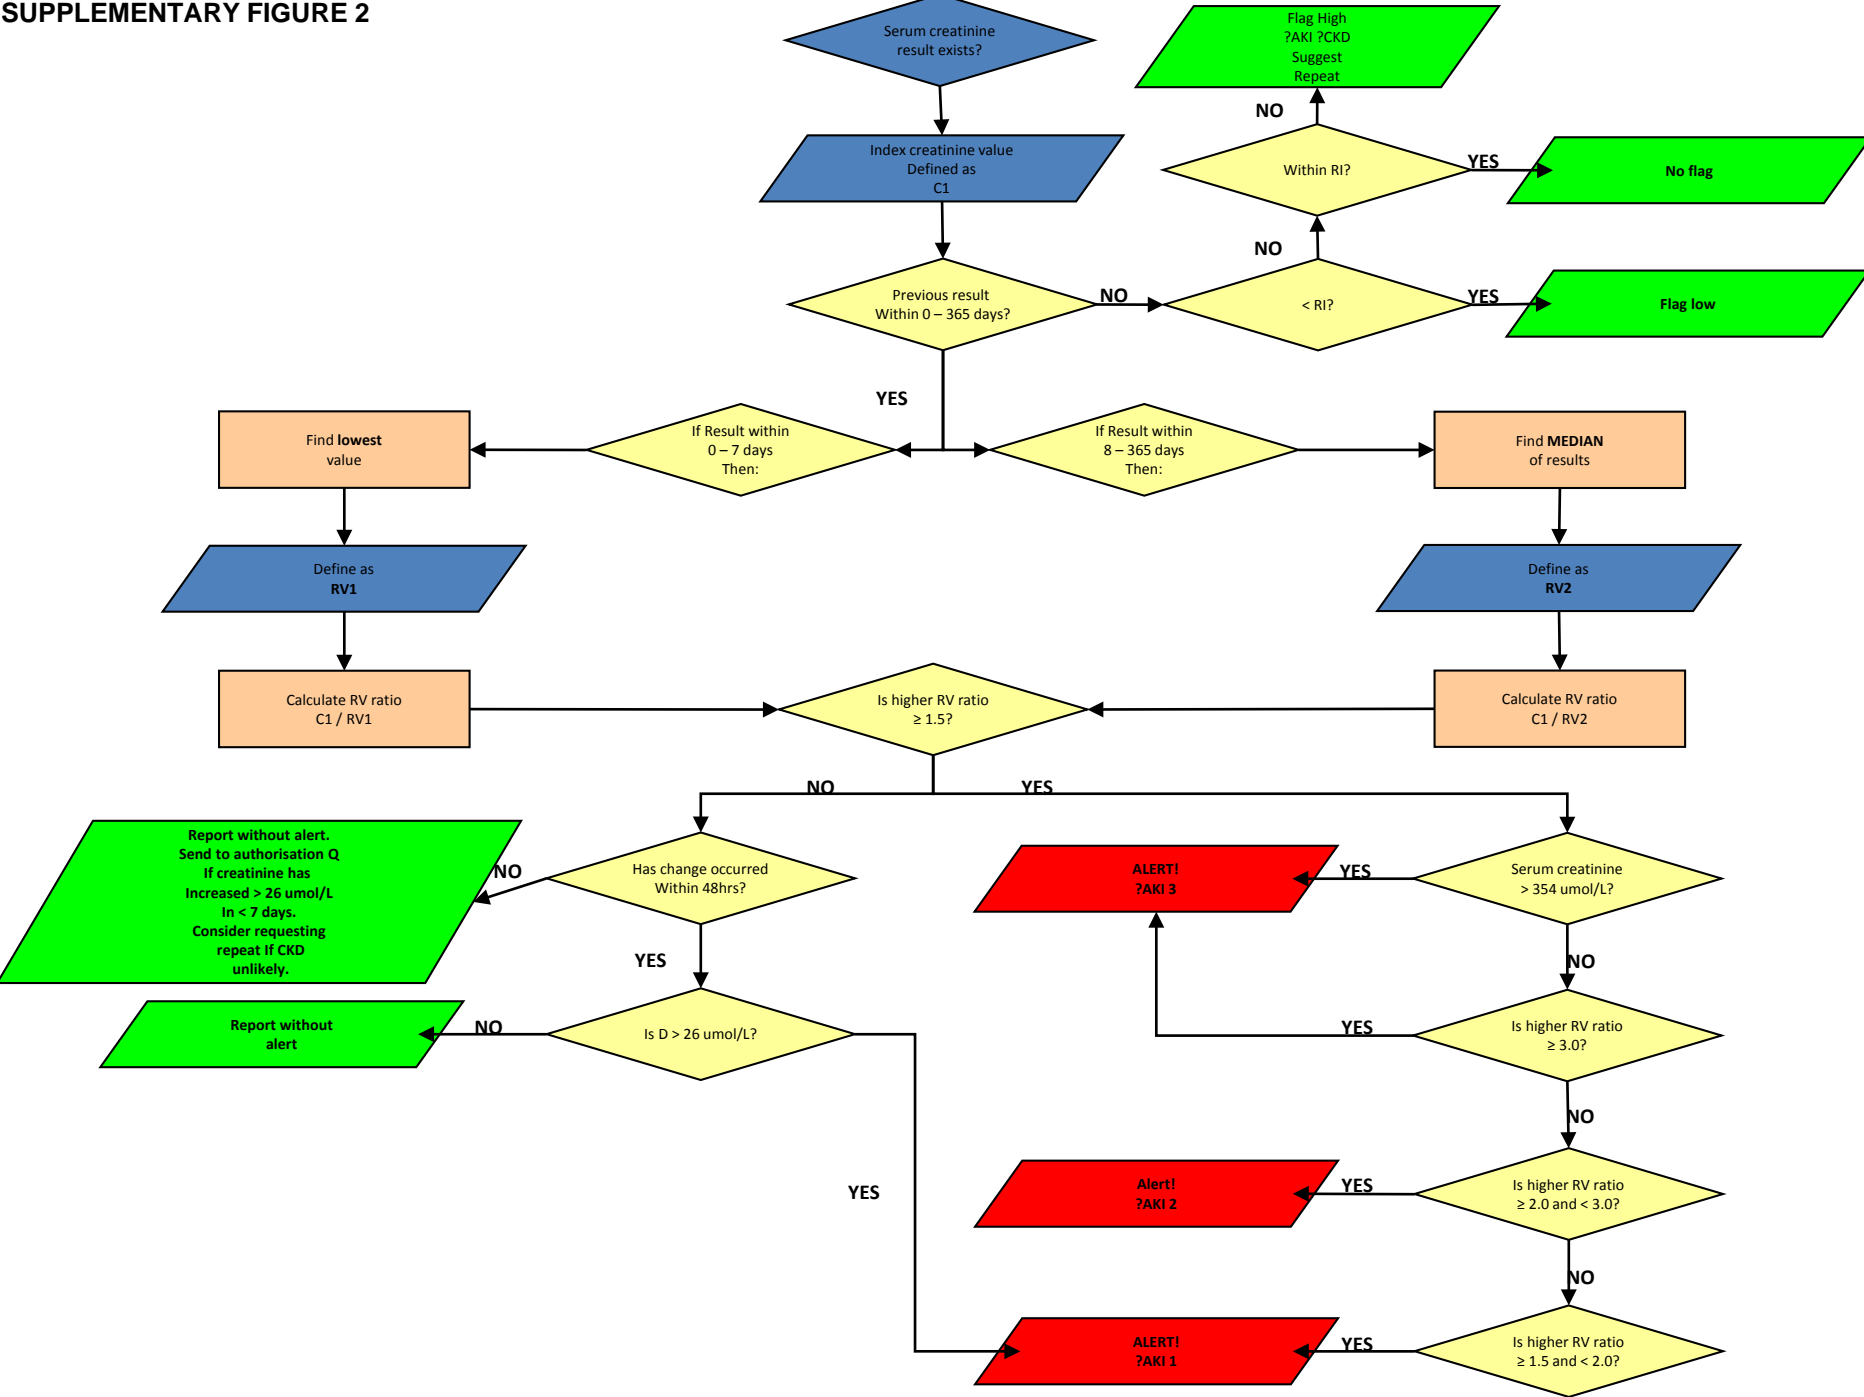

Supplement: CJN.05170516SupplementaryData.pdf [file CJN.05170516SupplementaryData.pdf]
